# Supplementary material for: Formation of the Secondary Abscission Zone Induced by the Interaction of Methyl Jasmonate and Auxin in Bryophyllum calycinum: Relevance to Auxin Status and Histology
Source: PubMed Central journal article supplement (PMC7215696; doi:10.3390/ijms21082784), 2020-04-16
Supplement: ijms-21-02784-s001.pdf [file ijms-21-02784-s001.pdf]

## Supplementary Material

**Table S1.** Effect of IAA at a concentration of 0.1% applied in the middle of the internode segments of *B. calycinum* on endogenous levels of some auxins.

| Auxins, pmol/gDW  | Top             |                 | Above Treatment |                 | Below Treatment |                 |
|-------------------|-----------------|-----------------|-----------------|-----------------|-----------------|-----------------|
|                   | Control         | IAA 0.1%        | Control         | IAA 0.1%        | Control         | IAA 0.1%        |
| IAA               | 1.283 ± 0.117b  | 1.168 ± 0.071b  | 0.535 ± 0.056a  | 4.557 ± 0.096d  | 0.298 ± 0.029 a | 3.237 ± 0.064c  |
| IAA <sub>sp</sub> | 0.144 ± 0.004c  | 0.090 ± 0.001b  | 0.083 ± 0.001ab | 0.164 ± 0.001d  | 0.071 ± 0.003a  | 0.342 ± 0.013e  |
| IAA-Glut          | 0.251 ± 0.007b  | 0.239 ± 0.002b  | 0.244 ± 0.004b  | 0.271 ± 0.011c  | 0.206 ± 0.005a  | 0.241 ± 0.003b  |
| IAA-Me            | 0.096 ± 0.011b  | 0.198 ± 0.004c  | 0.100 ± 0.002 b | 0.099 ± 0.005b  | 0.077 ± 0.001 a | 0.103 ± 0.009b  |
| IAA-carb          | 1.065 ± 0.142ab | 3.261 ± 0.628c  | 1.800 ± 0.202 b | 7.839 ± 0.367 d | 0.551 ± 0.121a  | 7.562 ± 0.535d  |
| Ox-IAA            | 0.847 ± 0.052ab | 1.901 ± 0.048b  | 0.106 ± 0.009 a | 37.220 ± 0.158c | 0.024 ± 0.004a  | 43.344 ± 1.078d |
| 4-Cl-IAA          | 0.074 ± 0.008ab | 0.318 ± 0.020d  | 0.073 ± 0.005ab | 0.191 ± 0.019c  | 0.054 ± 0.005 a | 0.108 ± 0.010 b |
| 5-Cl-IAA          | 4.237 ± 0.124d  | 2.777 ± 0.156bc | 2.534 ± 0.106b  | 4.582 ± 0.177d  | 1.710 ± 0.177a  | 3.072 ± 0.128c  |
| IBA               | 0.45 ± 0.08a    | 0.58 ± 0.06b    | 0.56 ± 0.10ab   | 0.63 ± 0.05 b   | 0.53 ± 0.10 ab  | 0.55 ± 0.01 ab  |

IAA: indole-3-acetic acid; IAA<sub>sp</sub>: indole-3-acetyl-L-aspartic acid; IAA-Glut: indole-3-acetyl-4-glutamic acid; IAA-Me: indole-3-acetic acid methyl ester; IAA-carb: indole-3-carboxylic acid; OxIAA: oxindole-3-acetic acid; 4-Cl-IAA: 4-chloroindole-3-acetic acid; 5-Cl-IAA: 5-chloroindole-3-acetic acid; IBA: indole-3-butyric acid. Values are expressed as the mean ± SE ( $n = 3$ ); Different letters indicate statistic difference by Duncan's Multiple Range Test, with  $p < 0.05$  after ANOVA.

**Table S2.** Effect of IAA at a concentration of 0.1% applied in the middle of the internode segments of *B. calycinum* on endogenous levels of abscisic acid (ABA), salicylic acid (SA), benzoic acid, (BA), JA (jasmonic acid), JA-Me and 12-oxo-phytodienoic acid (OPDA).

| Compound, pmol/gDW | Top             |                  | Above Treatment |                | Below Treatment |                 |
|--------------------|-----------------|------------------|-----------------|----------------|-----------------|-----------------|
|                    | Control         | IAA 0.1%         | Control         | IAA 0.1%       | Control         | IAA 0.1%        |
| ABA                | 0.289 ± 0.017a  | 0.633 ± 0.015c   | 0.271 ± 0.022a  | 0.525 ± 0.062b | 0.254 ± 0.011a  | 0.472 ± 0.034b  |
| SA                 | 17.19 ± 0.64c   | 10.31 ± 0.36a    | 8.78 ± 0.270a   | 10.74 ± 0.95a  | 13.19 ± 0.96b   | 9.73 ± 1.15a    |
| BA                 | 6.11 ± 0.43d    | 4.11 ± 0.05a     | 5.18 ± 0.15bc   | 4.72 ± 0.70ab  | 5.74 ± 0.15cd   | 4.08 ± 0.20a    |
| JA                 | 5.39 ± 0.05a    | 9.43 ± 0.33b     | 17.38 ± 1.11c   | 8.49 ± 0.14ab  | 22.47 ± 2.04d   | 7.87 ± 0.51ab   |
| JA-Me              | 0.083 ± 0.003a  | 0.091 ± 0.002abc | 0.093 ± 0.002bc | 0.099 ± 0.004c | 0.083 ± 0.003a  | 0.088 ± 0.004ab |
| OPDA               | 0.247 ± 0.011ab | 0.244 ± 0.011ab  | 0.274 ± 0.004b  | 0.317 ± 0.011c | 0.229 ± 0.008a  | 0.264 ± 0.014a  |

ABA: abscisic acid; SA: salicylic acid; BA: benzoic acid; JA: jasmonic acid; JA-Me: jasmonic acid methyl ester; OPDA: 12-oxo-phytodienoic acid; Values are expressed as the mean ± SE ( $n = 3$ ); Different letters indicate statistic difference by Duncan's Multiple Range Test, with  $p < 0.05$  after ANOVA.

**Table S3.** Effect of IAA at a concentration of 0.1% applied in the middle of the internode segments of *B. calycinum* on endogenous levels of some cytokinins.

| Cytokinins, fmol/gDW | Top          |              | Above Treatment |               | Below Treatment |              |
|----------------------|--------------|--------------|-----------------|---------------|-----------------|--------------|
|                      | Control      | IAA 0.1%     | Control         | IAA 0.1%      | Control         | IAA 0.1%     |
| t-Z                  | 28.5 ± 1.7ab | 20.4 ± 5.2a  | 40.9 ± 5.2bc    | 32.1 ± 6.9abc | 46.1 ± 6.8c     | 73.1 ± 2.8d  |
| c-Z                  | 27.1 ± 1.9ab | 23.3 ± 1.6a  | 32.0 ± 2.4bc    | 30.4 ± 3.5ab  | 30.8 ± 1.0ab    | 39.7 ± 3.4c  |
| t-ZR                 | 158.5 ± 5.2e | 41.2 ± 6.2b  | 104.8 ± 1.6d    | 31.8 ± 1.5ab  | 76.4 ± 1.5c     | 27.0 ± 0.5a  |
| c-ZR                 | 22.5 ± 0.7b  | 20.6 ± 0.7ab | 20.9 ± 0.3ab    | 22.1 ± 0.5ab  | 20.7 ± 3.0ab    | 18.0 ± 0.2a  |
| IP                   | 90.2 ± 1.6b  | 80.8 ± 3.7a  | 92.8 ± 3.3b     | 94.4 ± 3.3b   | 86.7 ± 2.6ab    | 87.1 ± 1.0ab |
| IPAD                 | 34.3 ± 0.4d  | 6.6 ± 1.1a   | 21.3 ± 0.5c     | 6.1 ± 0.6a    | 14.5 ± 0.3b     | 5.5 ± 0.1a   |
| KIN                  | 31.2 ± 3.8ab | 27.6 ± 3.3a  | 43.8 ± 4.8c     | 41.2 ± 1.2bc  | 37.3 ± 3.0abc   | 29.7 ± 2.0a  |
| KIN-R                | 8.9 ± 1.3a   | 7.0 ± 0.3a   | 8.5 ± 0.0a      | 8.0 ± 0.4a    | 6.9 ± 0.5a      | 8.1 ± 0.5a   |

t-Z: *trans*-zeatin; c-Z: *cis*-zeatin; t-ZR: *trans*-zeatin-7-riboside; c-ZR: *cis*-zeatin-riboside; IP: isopentenyladenine; IPAD: isopentenyladenosine; KIN: kinetin; KIN-R kinetin riboside; Values are expressed as the mean ± SE ( $n = 3$ ); Different letters indicate statistic difference by Duncan's Multiple Range Test, with  $p < 0.05$  after ANOVA.

**Table S4.** Effect of IAA at a concentration of 0.1% applied in the middle of the internode segments of *B. calycinum* on endogenous levels of some gibberellins.

| GAs, pmol/gDW    | Top           |               | Above Treatment |               | Below Treatment |               |
|------------------|---------------|---------------|-----------------|---------------|-----------------|---------------|
|                  | Control       | IAA 0.1%      | Control         | IAA 0.1%      | Control         | IAA 0.1%      |
| GA <sub>1</sub>  | 0.42 ± 0.06a  | 0.56 ± 0.09a  | 0.58 ± 0.11a    | 0.53 ± 0.09a  | 0.46 ± 0.05     | 0.49 ± 0.03a  |
| GA <sub>3</sub>  | 1.45 ± 0.21bc | 1.19 ± 0.19ab | 2.32 ± 0.26d    | 2.00 ± 0.17cd | 2.01 ± 0.22cd   | 0.62 ± 0.10a  |
| GA <sub>4</sub>  | 0.07 ± 0.00c  | 0.03 ± 0.01a  | 0.04 ± 0.01ab   | 0.05 ± 0.01ab | 0.04 ± 0.01ab   | 0.05 ± 0.01bc |
| GA <sub>5</sub>  | 0.26 ± 0.02a  | 0.22 ± 0.03a  | 0.21 ± 0.02a    | 0.69 ± 0.05c  | 0.14 ± 0.02a    | 0.55 ± 0.08b  |
| GA <sub>6</sub>  | 0.83 ± 0.06a  | 0.90 ± 0.03ab | 0.91 ± 0.01ab   | 0.89 ± 0.02ab | 0.82 ± 0.05a    | 1.02 ± 0.09b  |
| GA <sub>7</sub>  | 0.24 ± 0.02b  | 0.15 ± 0.02a  | 0.13 ± 0.02a    | 0.21 ± 0.04ab | 0.21 ± 0.01ab   | 0.17 ± 0.03ab |
| GA <sub>9</sub>  | 0.20 ± 0.03c  | 0.05 ± 0.01ab | 0.07 ± 0.01ab   | 0.07 ± 0.01ab | 0.04 ± 0.05a    | 0.10 ± 0.02b  |
| GA <sub>20</sub> | 0.14 ± 0.01a  | 0.28 ± 0.01bc | 0.15 ± 0.01ab   | 0.37 ± 0.06c  | 0.09 ± 0.01a    | 0.34 ± 0.09c  |

Values are expressed as the mean ± SE ( $n = 3$ ); Different letters indicate statistic difference by Duncan's Multiple Range Test, with  $p < 0.05$  after ANOVA.

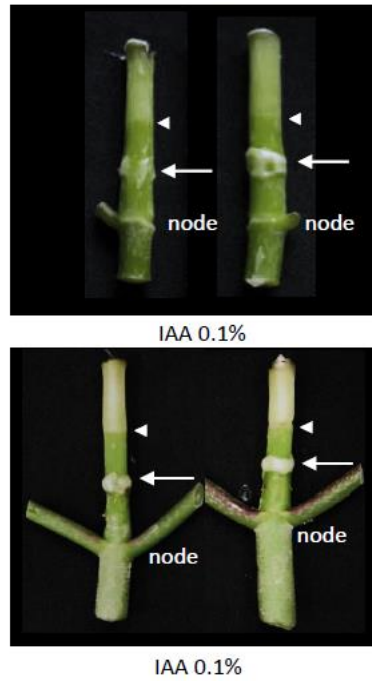

**Figure S1.** The effect of IAA at a concentration of 0.1% on the secondary abscission zone formation in the internode segments with lower node and in decapitated stem of *B. calycinum*. Upper figure: the secondary abscission zone formation in excised internode segment with lower node treated in the middle of the internode with IAA, photographed 9 days after treatment; lower figure: the secondary abscission zone formation in the last internode treated in the middle with IAA after decapitation of apical part of shoot in growing plant. White arrows indicate the place of treatment, and white arrowheads indicate the place of the formation of the secondary abscission zone. Photographs were taken 9 days after treatment.

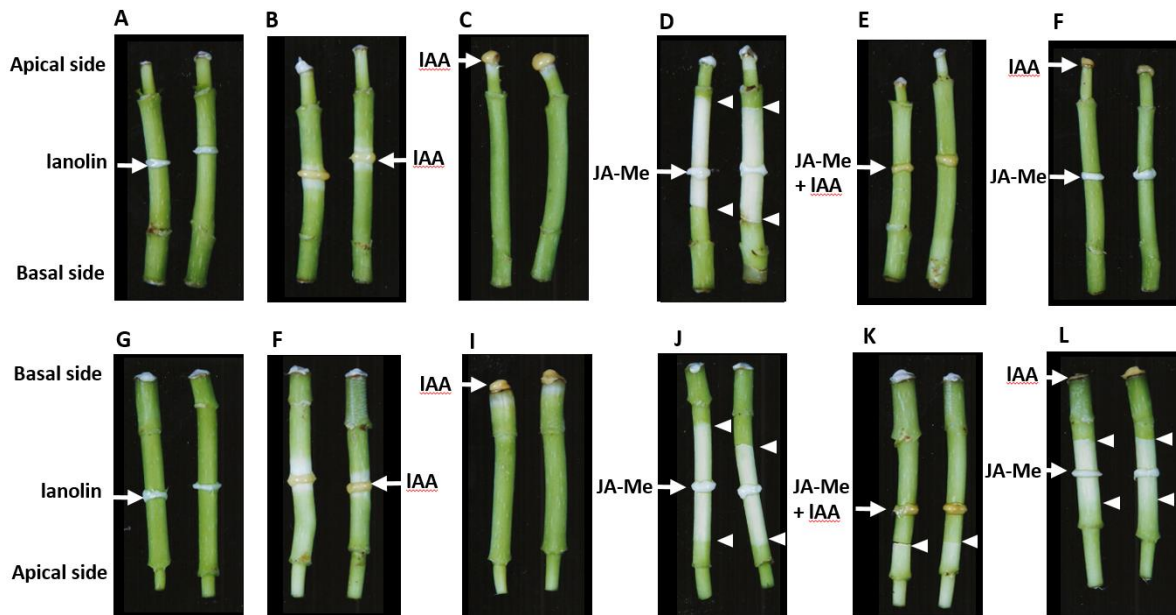

**Figure S2.** The effect of IAA 0.5% and/or JA-Me 0.5% on the formation of the secondary abscission zone depending on place of treatment in excised stem segments with nodes below and above the internode in *B. calycinum*. After the treatment, the excised segments were kept in normal (A–F) and inverted position (G–L), and then photographed 10 days after treatments. (A,G) control, lanolin applied on the top and in the middle of internode; (B,H) IAA alone applied in the middle of internode and lanolin on the top of internode; (C,I) IAA alone applied on the top of internode; (D,J) JA-Me alone

applied in the middle of internode and lanolin on the top; (E,K) JA-Me and IAA applied together in the middle of internode; (F,L) JA-Me applied in the middle and IAA applied on the top. White arrows indicate the place of treatment, and white arrowheads indicate the place of the formation of the secondary abscission zone.

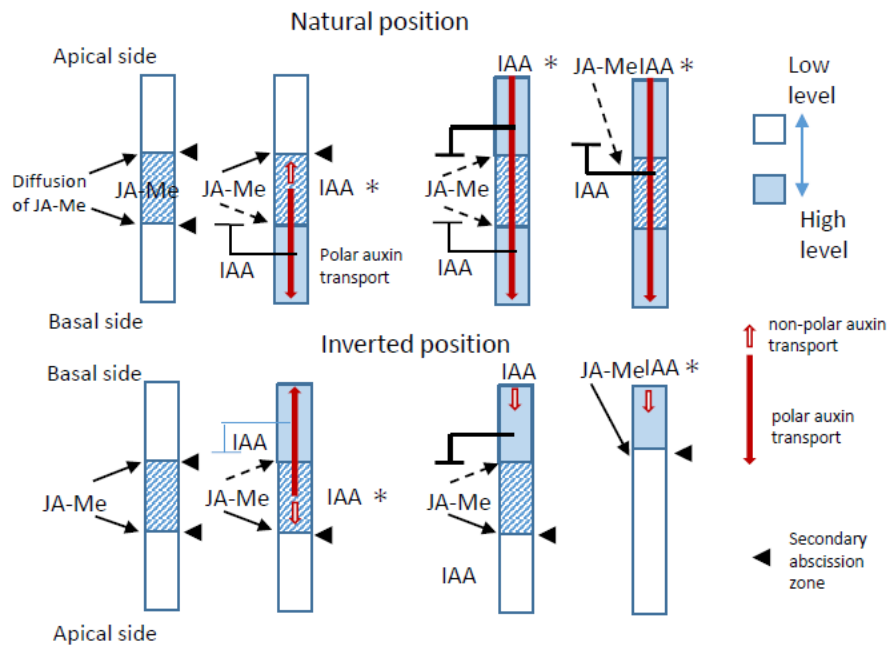

**Figure S3.** Diagrammatic representation of IAA and JA-Me interaction on the secondary abscission zone formation in the internode segments of *B. calycinum*.
